# Supplementary material for: The feedback loop between MTA1 and MTA3/TRIM21 modulates stemness of breast cancer in response to estrogen
Source: PubMed Central journal article supplement (PMC11330498; doi:10.1038/s41419-024-06942-w), 2024-08-17

Figure 1E

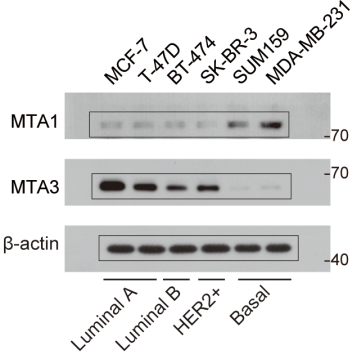

Figure 2B

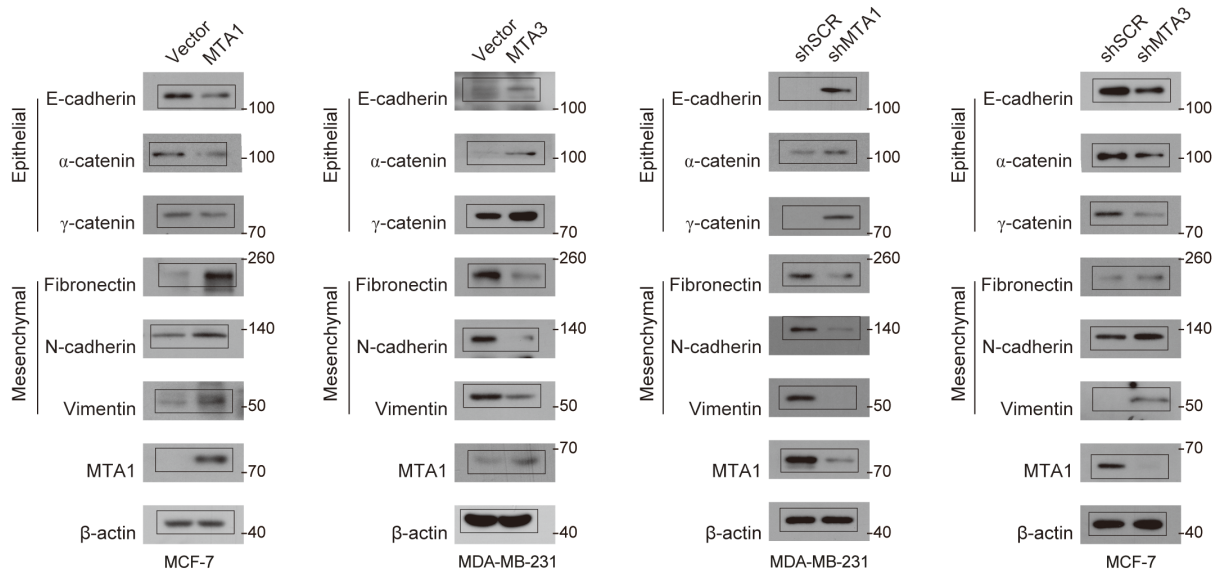

Figure 2E

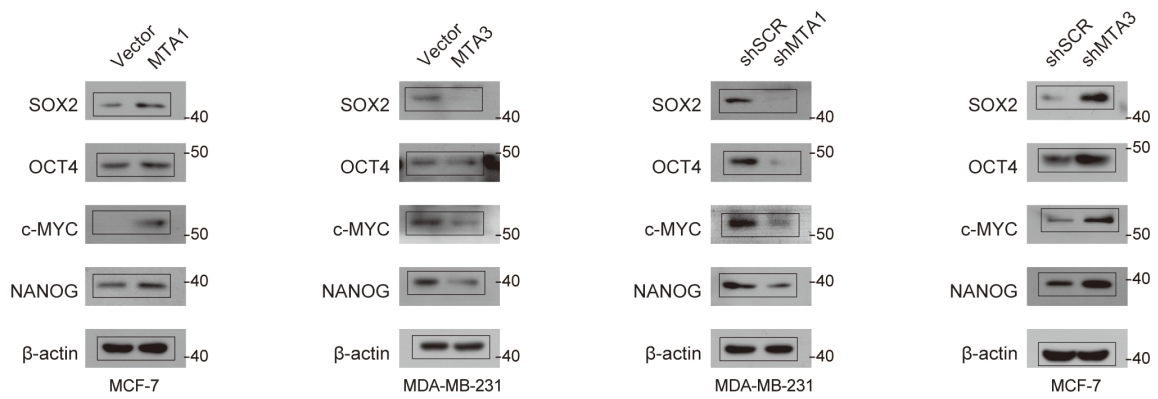

Figure 3E

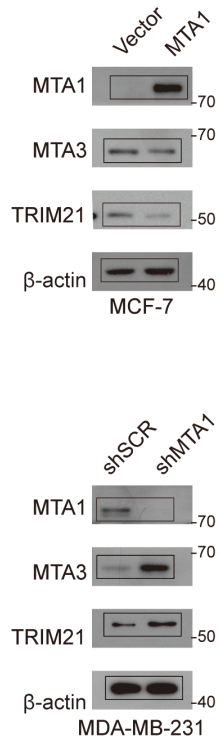

Figure 3G

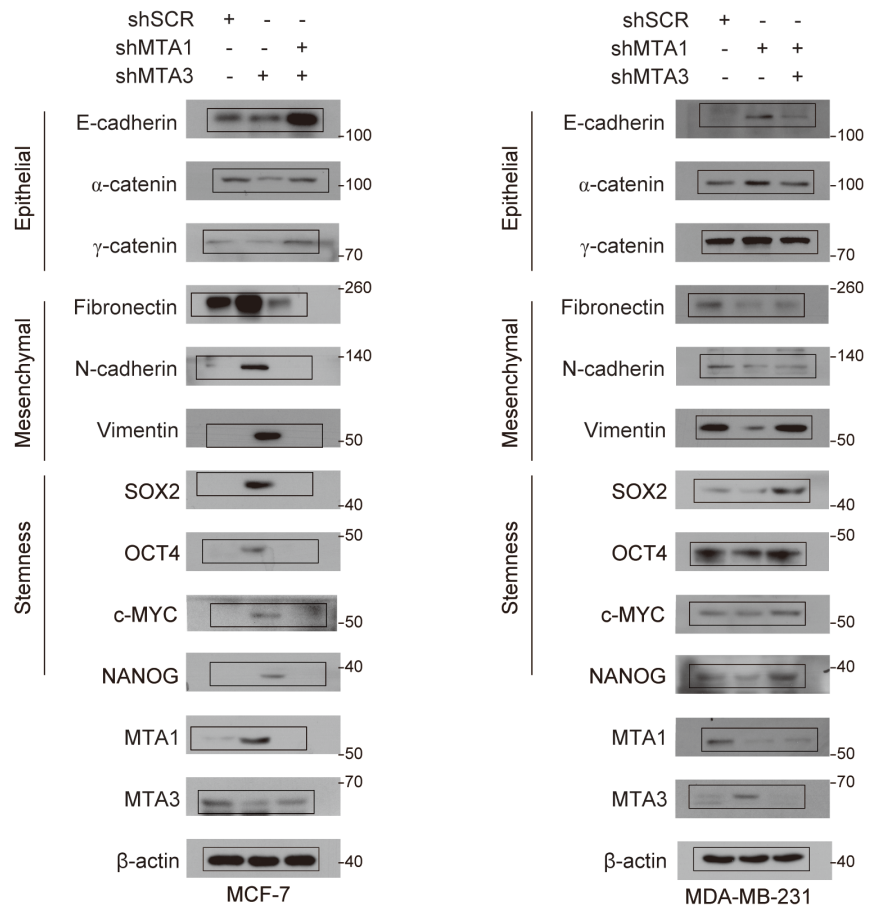

Figure 5D

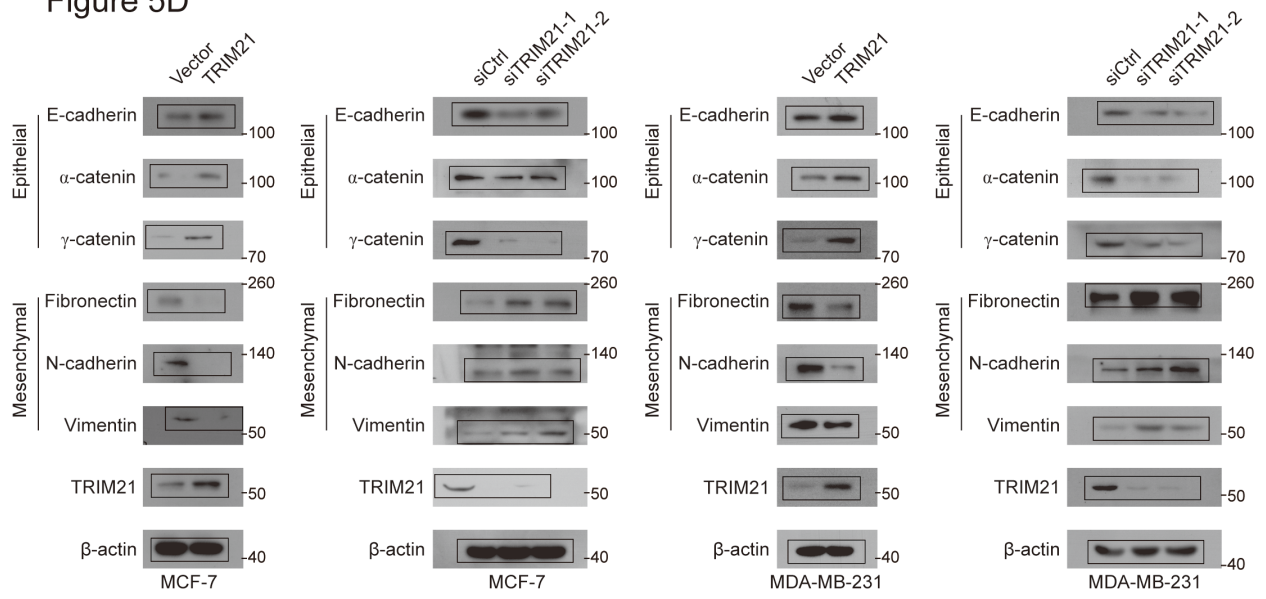

Figure 5F

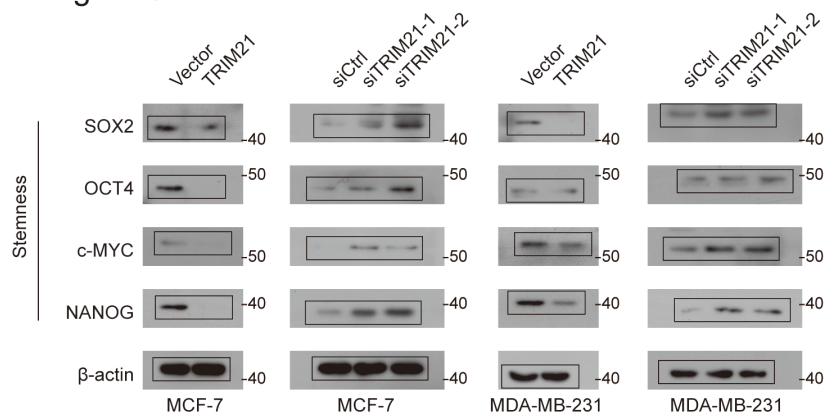

Figure 6A

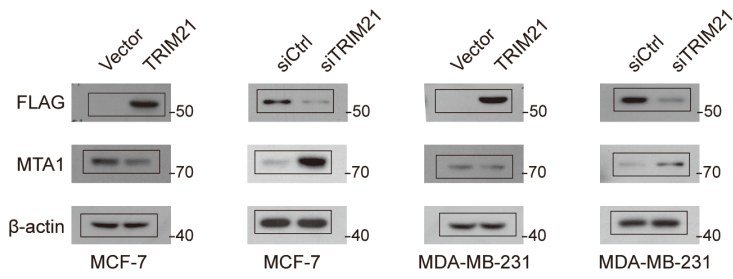

Figure 6B

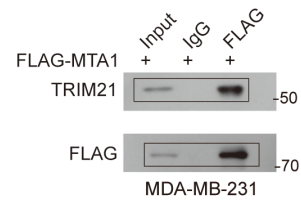

Figure 6C

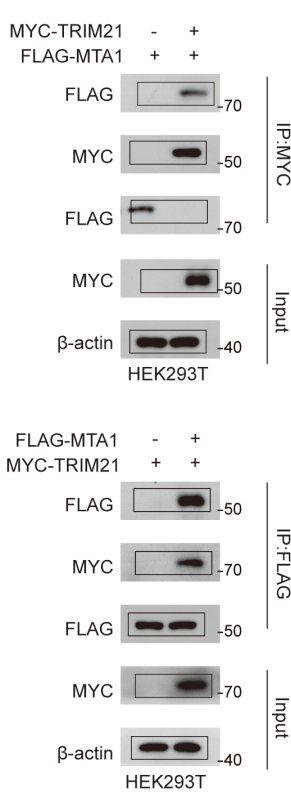

Figure 6D

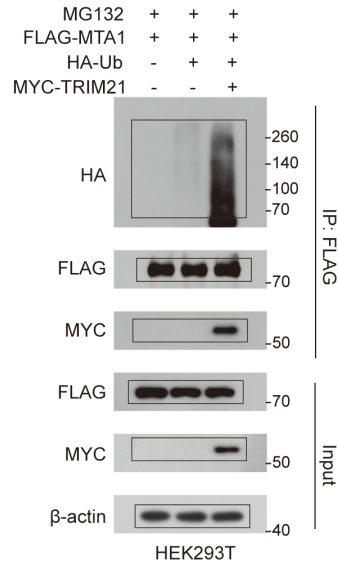

Figure 6E

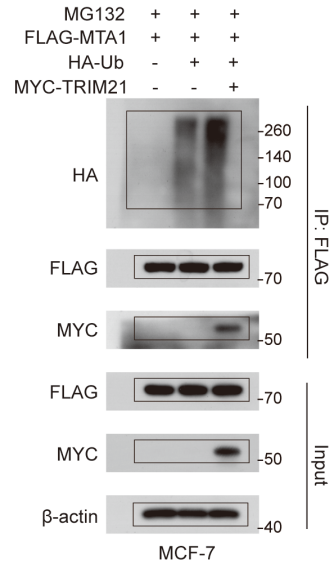

Figure 6F

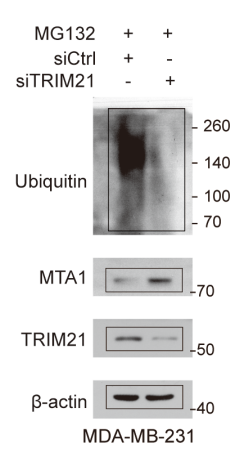

Figure 6G

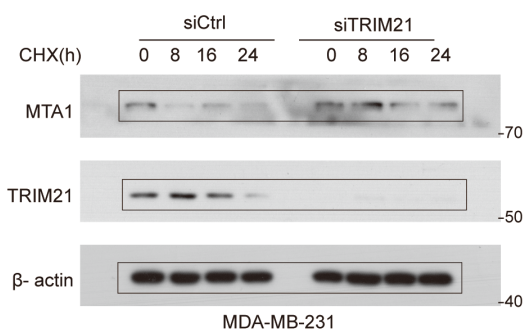

Figure 6H

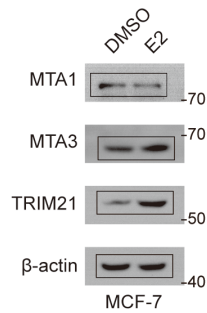

Figure 6I

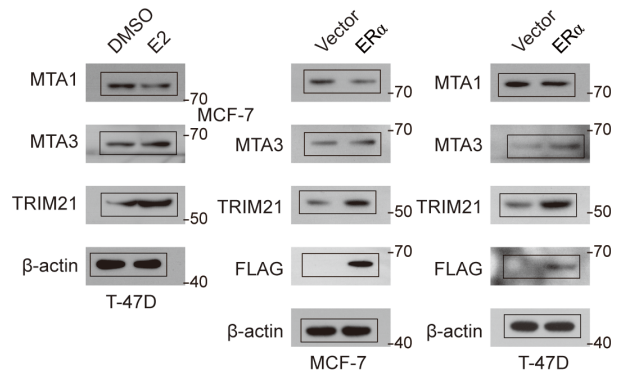

### Supplementary Figure 1C

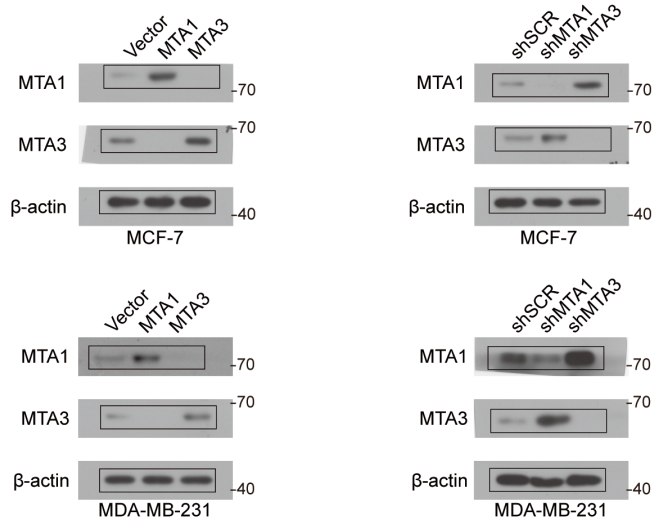

### Supplementary Figure 6A

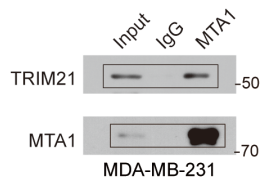

### Supplementary Figure 6B

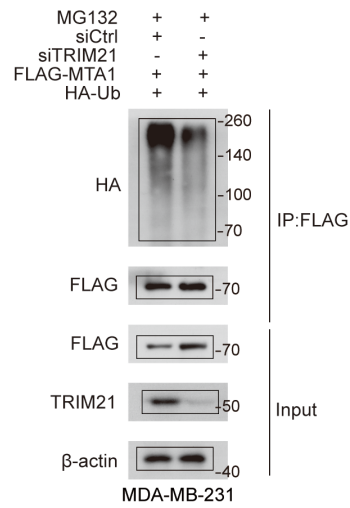

Supplement: 41419_2024_6942_MOESM2_ESM.pdf [file 41419_2024_6942_MOESM2_ESM.pdf]
